# Supplementary material
Source: Springer Nature journal article supplement (https://www.springermedizin.de/resource/supplementary/12889_2008_1407_MOESM3_ESM.pdf/9504060)
Supplement: MOESM3 [file 9504060]

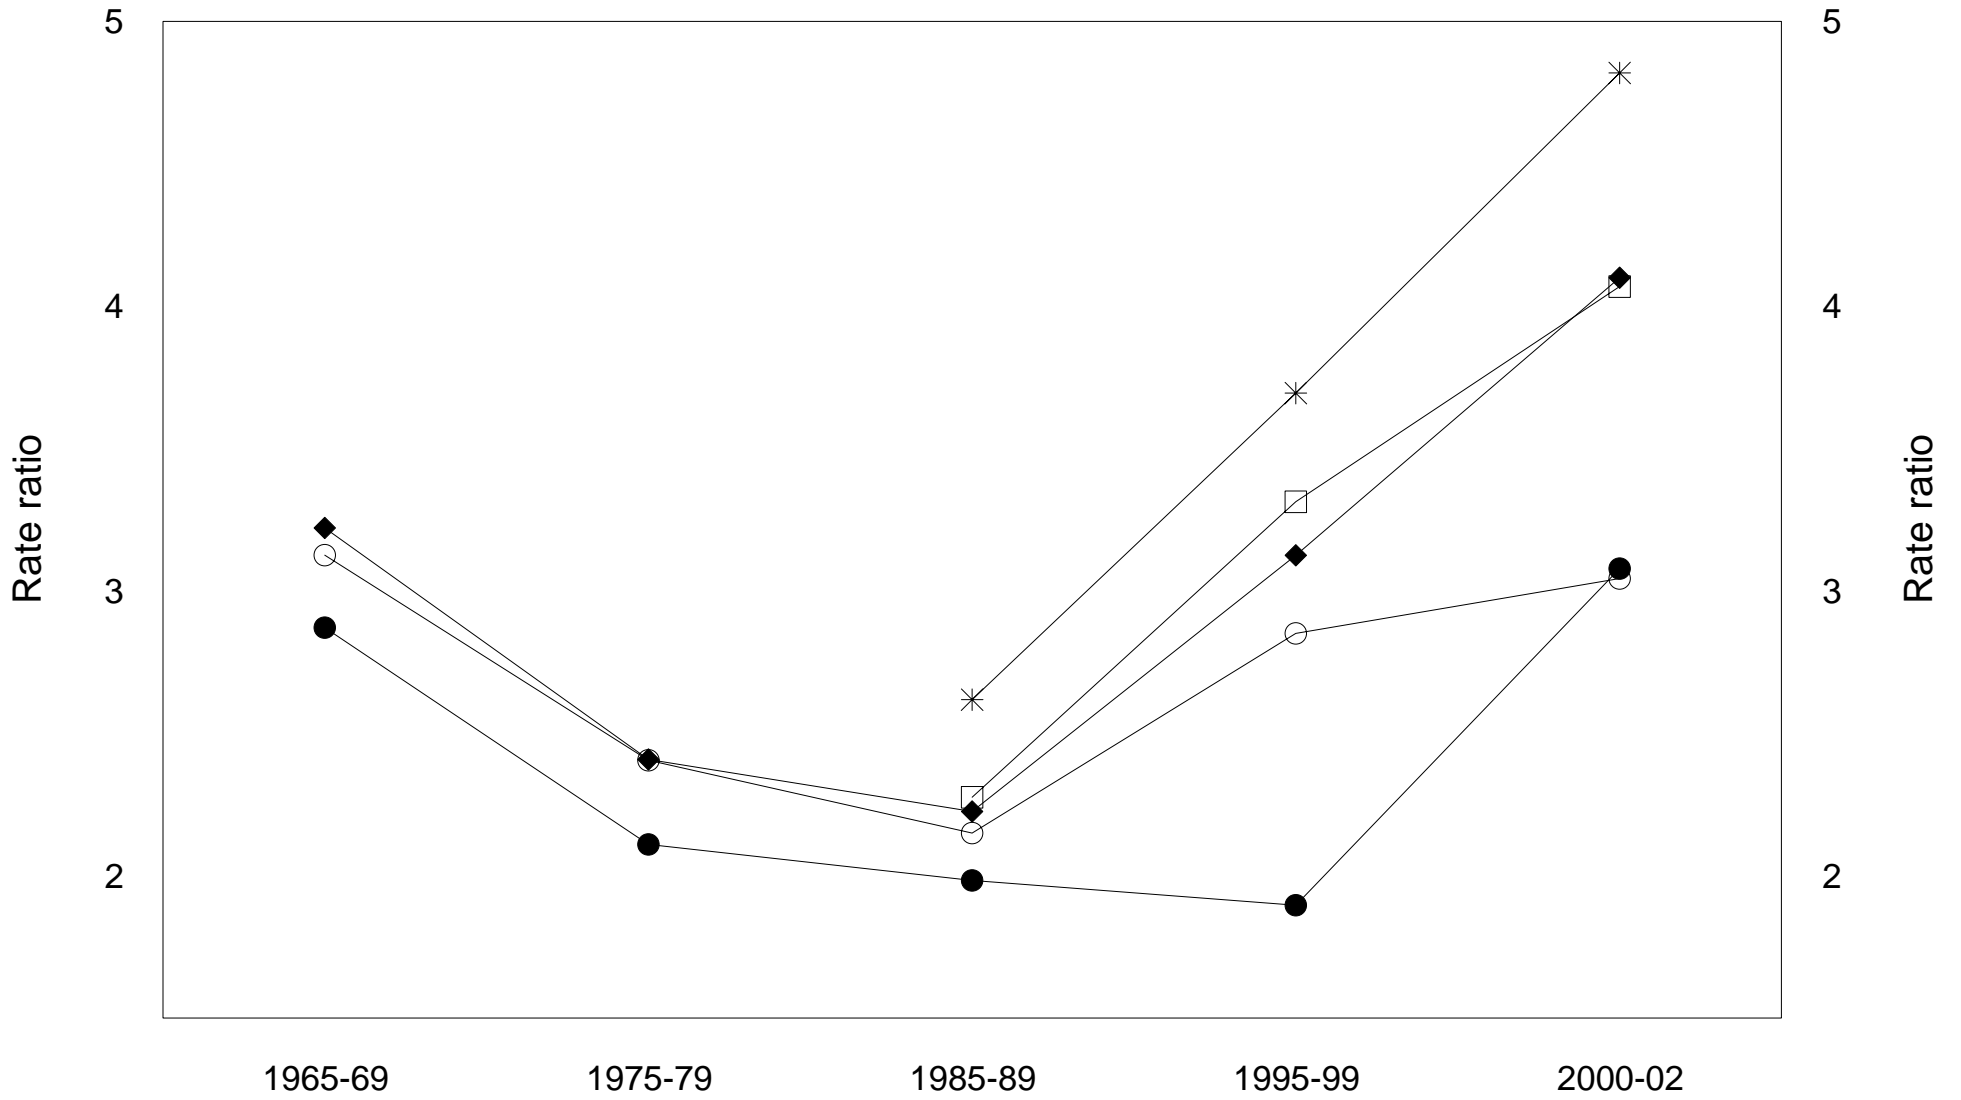

- Crude IMR highest vs lowest
- ◆ IMR ≥ 500 g highest vs lowest
- IMR ≥ 500 g highest 2 vs lowest 2
- IMR ≥ 1,000 g highest 2 vs lowest 2
- \* IMR ≥ 1,000 g highest vs lowest
